# Supplementary material for: Highly efficient macroporous adsorbents for toxic metal ions in water systems based on polyvinyl alcohol–formaldehyde sponges
Source: Royal Society of Chemistry journal article supplement (doi:10.1039/c5ta09295g), 2016-01-01
Supplement: c5ta09295g3.pdf [file c5ta09295g3.pdf]

## Supporting information

# Highly Efficient Macroporous Adsorbents for Toxic Metal Ions in Water System Based on Polyvinyl Alcohol-Formaldehyde Sponges

Yanxiong Pan, Zhi Liu, Weicai Wang, Chao Peng, Kai Shi, Xiangling Ji\*

State Key Laboratory of Polymer Physics and Chemistry, Changchun Institute of Applied Chemistry, Chinese Academy of Sciences, Changchun 130022, P. R. of China

### Part I

#### 1. Grafting percentage (*GP*) and grafting efficiency (*GE*)

The nitrogen content of as-prepared PVF-g-PAM was also measured by elementary analysis, and the *GP* and *GE* were also calculated as the following equation:

$$\begin{aligned} GP &= \frac{W_2 \times a\%}{W_0} \times 100 = \frac{W_2 \times a\%}{W_2 - W_2 \times a\%} \times 100 = \frac{W_2 \times a\%}{W_2 - W_2 \times a\%} \times 100 \\ &= \frac{a\%}{1 - a\%} \times 10 \end{aligned} \quad (1)$$

$$GE = \frac{W_2 \times a\%}{W_1} \times 100 \quad (2)$$

where  $W_0$ ,  $W_1$ ,  $W_2$  and  $a\%$  are the weight (g) of pristine PVF sponge, AM monomer, dried PVF-g-PAM after removing the homopolymer, the grafted PAM content (w/w) in the PVF-g-PAM, respectively.

In the term of relationship between  $a\%$  in the PVF-g-PAM and nitrogen content ( $N\%$ ) obtained using the elementary analysis can be written as follow;

$$N\% = \frac{W_2 \times a\% \times 14.0/71.1}{W_2} = \frac{14.0}{71.1} \times a\% \quad (3)$$

where the  $N\%$ , 14.0 and 71.1 are the nitrogen content of as-prepared PVF-g-PAM, the standard weight of nitrogen atom and the molar mass of acrylamide, respectively.

Substitution of Eq. (3) into the Eq. (1) and Eq. (2) leads to

$$GP = \frac{N\% \times 71.1/14.0}{1 - N\% \times 71.1/14.0} \times 100 = \frac{N\%}{0.197 - N\%} \times 100 \quad (4)$$

$$GE = \frac{W_2 \times N\% \times 71.1/14.0}{W_1} \times 100 = \frac{W_2 \times N\%}{0.197W_1} \times 100 \quad (5)$$

## 2. Hydrolysis degree ( $HD$ )

$$n = x + y \quad (6)$$

$$HD = \frac{y}{n} \times 100 \quad (7)$$

where the  $n$ ,  $x$  and  $y$  is the total molar amount of AM in a particular sample, the molar amount of residue AM and hydrolyzed AM under alkaline condition, respectively. The nitrogen content for a specific sample can also be calculated as the following equation:

$$N\% = \frac{14.0n}{m_0 + 71.1n} \quad (8)$$

while the  $m_0$  is the weight of one particular sample. Thus, the Eq. (8) is reduced to

$$n = \frac{m_0 \cdot N\%}{14.0 - 71.1 \cdot N\%} \quad (9)$$

After hydrolysis under alkaline condition, the nitrogen content ( $N_1\%$ ) of sample can be expressed as:

$$N_1\% = \frac{14.0x}{71.1x + 94.0y + m_0} \quad (10)$$

where 94.0 is the molar mass of sodium acrylate formed after hydrolysis. After reducing the Eq. 10, the  $y$  can be expressed as follow:

$$y = \frac{14.0x - 71.1x \cdot N_1\% - N_1\% \cdot m_0}{94.0 \cdot N_1\%} \quad (11)$$

Substitution of Eq. 7 and Eq.9 into Eq. 10 or 11, we have the following equation:

$$HD = \left(1 - \frac{23 + 14/N\%}{23 + 14/N_1\%}\right) \times 100 \quad (12)$$

Part II

a)

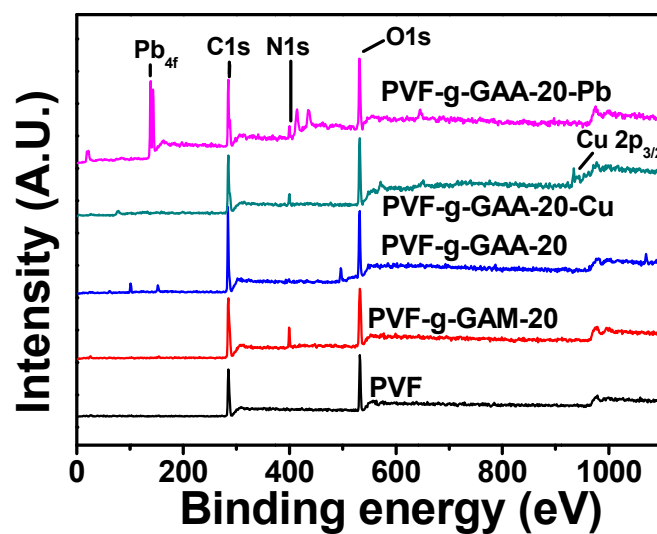

b)

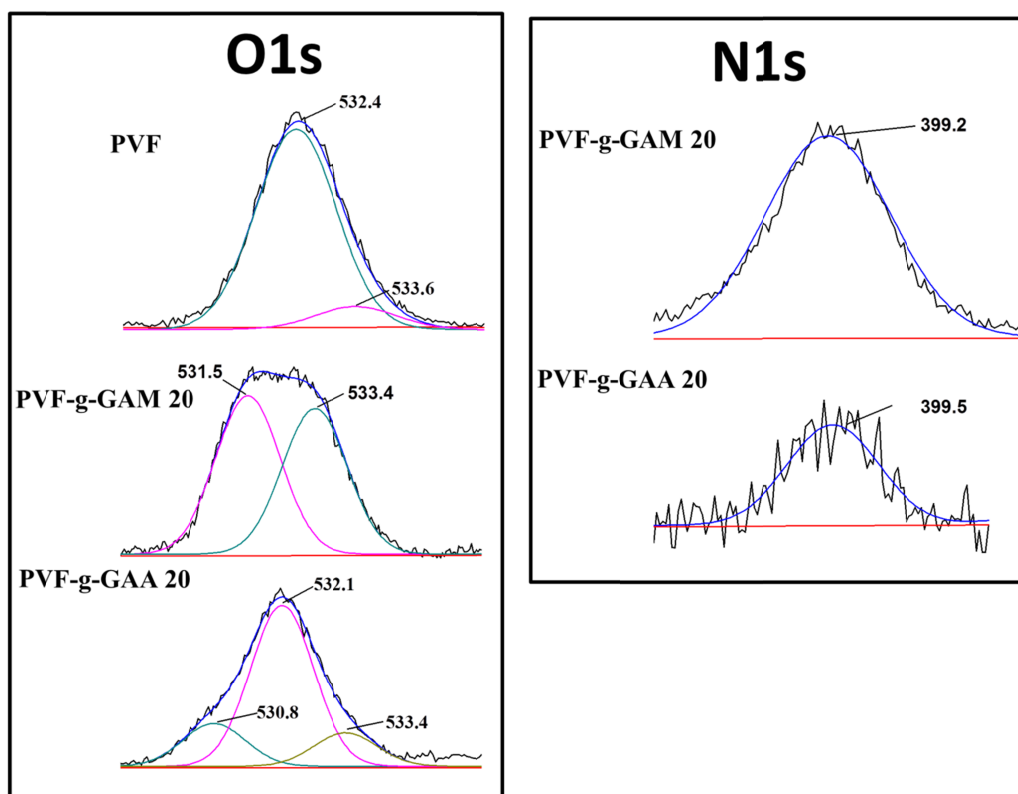

**Figure S1.** XPS spectra of samples, (a) survey scanning of PVF, PVF-g-GAM-20, PVF-g-GAA-20, PVF-g-GAA-20-Cu, PVF-g-GAA-20-Pb, (b) N and O assignment for PVF, PVF-g-GAM-20, PVF-g-GAA-20.
